# Supplementary material for: Performance optimization of freestanding MWCNT-LiFePO4 sheets as cathodes for improved specific capacity of lithium-ion batteries
Source: Royal Society of Chemistry journal article supplement (doi:10.1039/c8ra01461b), 2018-01-01
Supplement: c8ra01461b1.pdf [file c8ra01461b1.pdf]

Electronic Supplementary Material

Performance optimization of freestanding MWCNT-LiFePO<sub>4</sub> sheets as cathodes for improved specific capacity of lithium-ion batteries

Rahmat Agung Susantyo<sup>1</sup>, Tawaddod Saif Alkindi<sup>1</sup>, Amarsingh Bhabu Kanagaraj<sup>1</sup>, Boohyun An<sup>1</sup>, Hamda Alshibli<sup>1</sup>, Daniel Choi<sup>1</sup>, Sultan AlDahmani<sup>2</sup>, Hamed Fadaq<sup>2</sup> and Saif Almheiri<sup>1,3\*</sup>

<sup>1</sup> Department of Mechanical Engineering, Khalifa University of Science and Technology, Masdar Institute, Masdar City, P.O. Box 54224, Abu Dhabi, United Arab Emirates

<sup>2</sup> United Arab Emirates Space Agency, Space Missions' Science and Technology Directorate, P.O. Box: 7133, Abu Dhabi, United Arab Emirates

<sup>3</sup> Division of Engineering Technology and Science, Higher Colleges of Technology, United Arab Emirates

\* Corresponding author: S. Almheiri (saif.almheiri@ku.ac.ae , salmheiri@masdar.ac.ae)

Mass loading of freestanding MWCNT-LiFePO<sub>4</sub> sheets at different gap size:

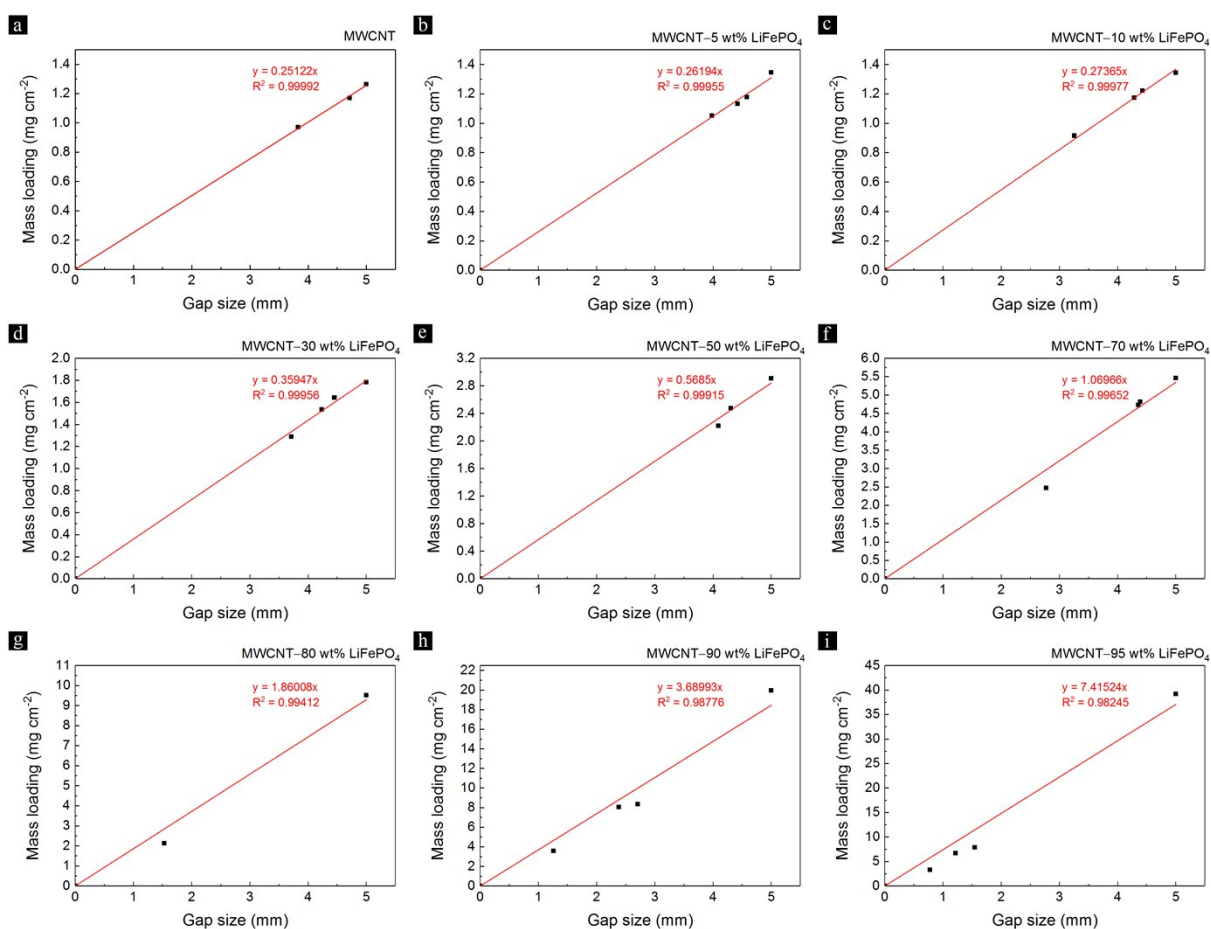

Figure S1 The resulting mass loading at different gap size of the film applicator of (a) pristine MWCNT and (b-i) MWCNT-LiFePO<sub>4</sub> with (b) 5 wt% LiFePO<sub>4</sub>, (c) 10 wt% LiFePO<sub>4</sub>, (d) 30 wt% LiFePO<sub>4</sub>, (e) 50 wt% LiFePO<sub>4</sub>, (f) 70 wt% LiFePO<sub>4</sub>, (g) 80 wt% LiFePO<sub>4</sub>, (h) 90 wt% LiFePO<sub>4</sub>, and (i) 95 wt% LiFePO<sub>4</sub>.

Ball-milling treatment:

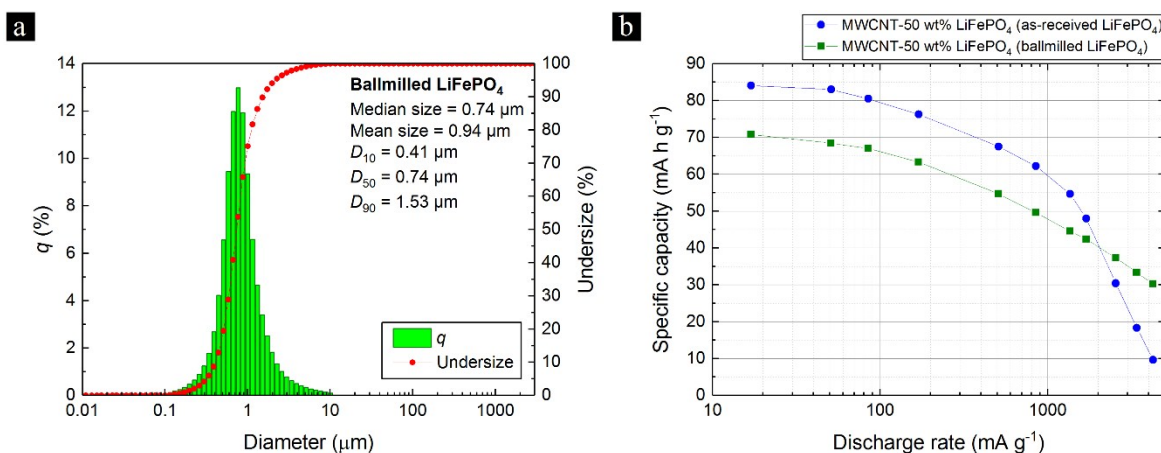

Figure S2 (a) The particle size distribution of ballmilled  $\text{LiFePO}_4$ . (b) The specific capacity at different discharge rate of MWCNT-50 wt%  $\text{LiFePO}_4$  from as-received  $\text{LiFePO}_4$  and ballmilled  $\text{LiFePO}_4$  powders.

We produced ballmilled  $\text{LiFePO}_4$  powders using ballmill machine. The ballmilled  $\text{LiFePO}_4$  powders have a smaller median size of  $0.74 \mu\text{m}$  (Figure S2a) compared to  $3.55 \mu\text{m}$  of as-received  $\text{LiFePO}_4$  powders. Figure S2b shows the effect of particle size to specific capacity of MWCNT- $\text{LiFePO}_4$  at a fixed  $\text{LiFePO}_4/\text{MWCNT}$  ratio of 1. The MWCNT-50 wt%  $\text{LiFePO}_4$  from ballmilled  $\text{LiFePO}_4$  powders shows superior specific capacity of 37.3, 33.4, 30.2  $\text{mA h g}^{-1}$  compared to 30.4, 18.3, 9.6  $\text{mA h g}^{-1}$  of sample using as-received  $\text{LiFePO}_4$  powders, at high discharge rate of 2550, 3400, 4250  $\text{mA g}^{-1}$ , respectively. This is attributed to small lithium-ion diffusion distance in  $\text{LiFePO}_4$  particle. The MWCNT-50 wt%  $\text{LiFePO}_4$  from ballmilled  $\text{LiFePO}_4$  powders shows smaller specific capacity of 70.8 instead of 84  $\text{mA h g}^{-1}$  at low discharge rate of 17  $\text{mA g}^{-1}$ . It might be due to oxidation of the high surface-to-volume-ratio particles during ballmill (non-optimized ballmilling process), which leads to a decrease in the amount of  $\text{Li}^+$  ions which can be exchanged and cycled. Nevertheless, we showed that the reduction in particle size leads to better performance at high discharge rate.
